# Supplementary material
Source: Springer Nature journal article supplement (https://www.springermedizin.de/resource/supplementary/12933_2012_568_MOESM3_ESM.pdf/9538456)

**D**

Women

Age-adjusted Odds Ratios of Diabetes

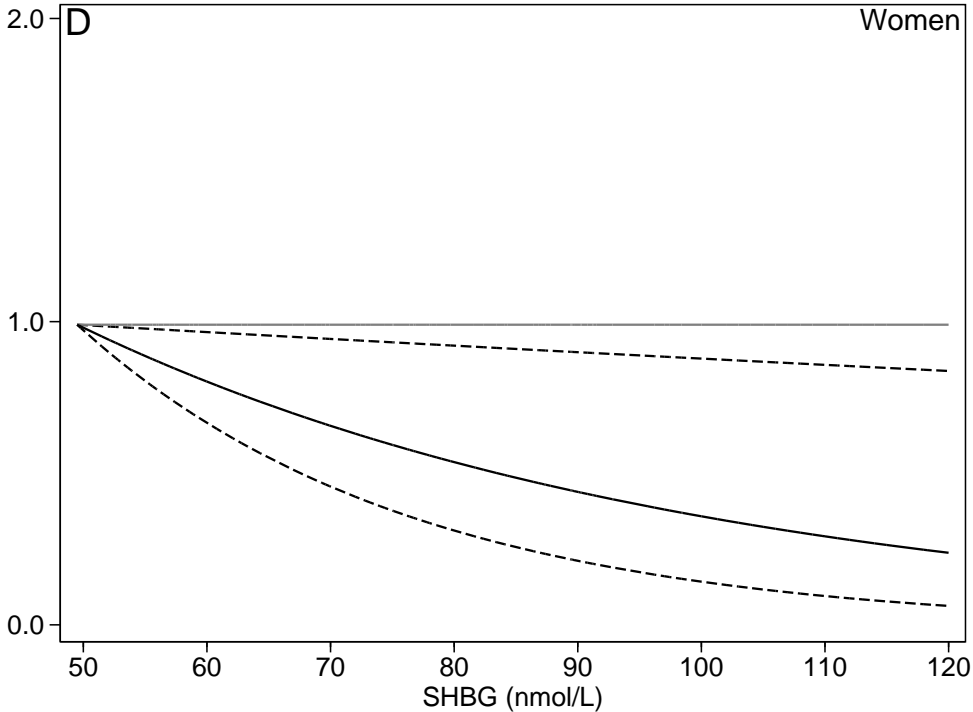

Supplement: MOESM3 [file 9538456]
